# Supplementary material for: High adsorption and efficient visible-light-photodegradation for cationic Rhodamine B with microspheric BiOI photocatalyst
Source: Royal Society of Chemistry journal article supplement (doi:10.1039/c4ra05506c), 2014-08-27
Supplement: c4ra05506c1.pdf [file c4ra05506c1.pdf]

*High adsorption and efficient visible-light-photodegradation for cationic*

*Rhodamine B with microspheric BiOI photocatalyst*

X.M. Wang<sup>a</sup>, S.G. Yang<sup>a</sup>, H. Li<sup>b</sup>, W Zhao<sup>a</sup>, C. Sun<sup>a</sup>, H. He<sup>a</sup>

<sup>a</sup>State Key Laboratory of Pollution Control and Resource Reuse, School of the Environment,  
Nanjing University, Nanjing 210023, PR China

<sup>b</sup>Department of Plant, Soil and Microbial Sciences, Michigan State University, East Lansing, MI  
48824, USA

\*Corresponding author (S.G. Yang): E-mail: [yangsg@nju.edu.cn](mailto:yangsg@nju.edu.cn) or [yangdlut@126.com](mailto:yangdlut@126.com)

*The Supporting Information Available* contains 6 pages, including Figures S1-S7.

## Figures

**Figure S1** The chemical structure of Rhodamine B (RhB).

**Figure S2** Adsorption isotherms of RhB by BiOI at different temperatures. Dose of BiOI was 1 g/L.

**Figure S3** The zeta potentials curve of the as-synthesized BiOI products.

**Figure S4** Residual RhB concentrations after desorption by NH<sub>4</sub>Ac solutions. Dose of BiOI was 1 g/L,  $C_0=60$  mg/L and  $T=298$  K.

**Figure S5** The diffuse reflection spectrum of as-prepared BiOI samples. The inset is the  $(Ah\nu)^{1/2}-h\nu$  curve.

**Figure S6** (a) Residual RhB concentrations after desorption by 0.5 M NH<sub>4</sub>Ac solutions. Dose of BiOI was 1 g/L,  $C_0=5$  mg/L and  $T=298$  K. (b) UV-vis spectral changes of RhB after lighting for 1 h.

**Figure S7** The change of RhB concentration in pure water after adsorption for 1 h in dark as a function of irradiation time.

## Figures

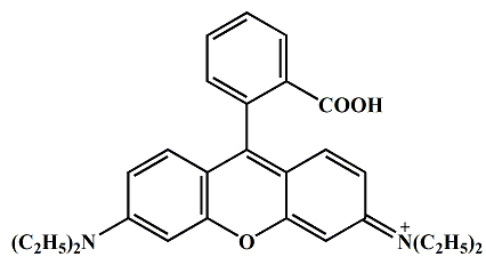

**Figure S1.** The chemical structure of Rhodamine B (RhB).

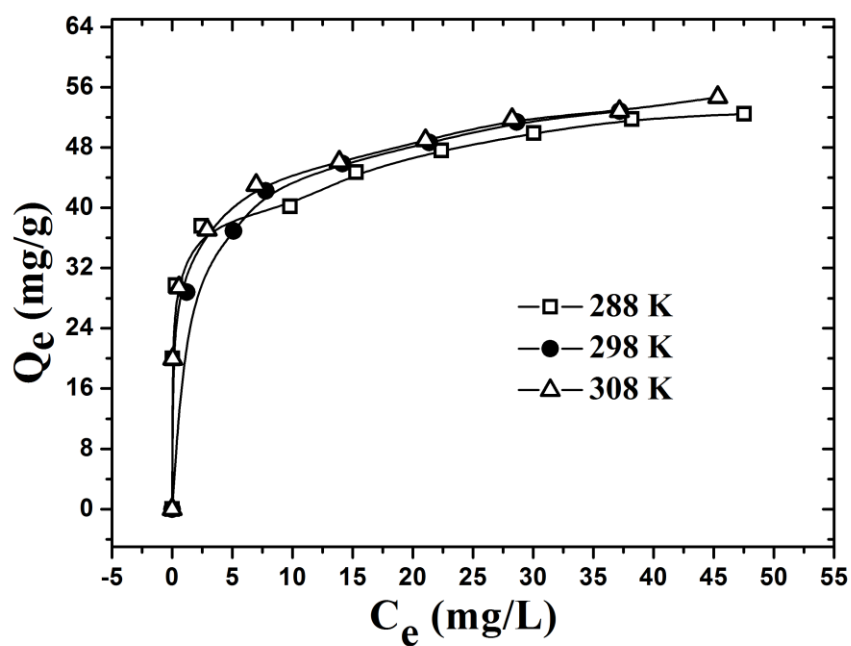

**Figure S2.** Adsorption isotherms of RhB by BiOI at different temperatures. Dose of BiOI was 1 g/L.

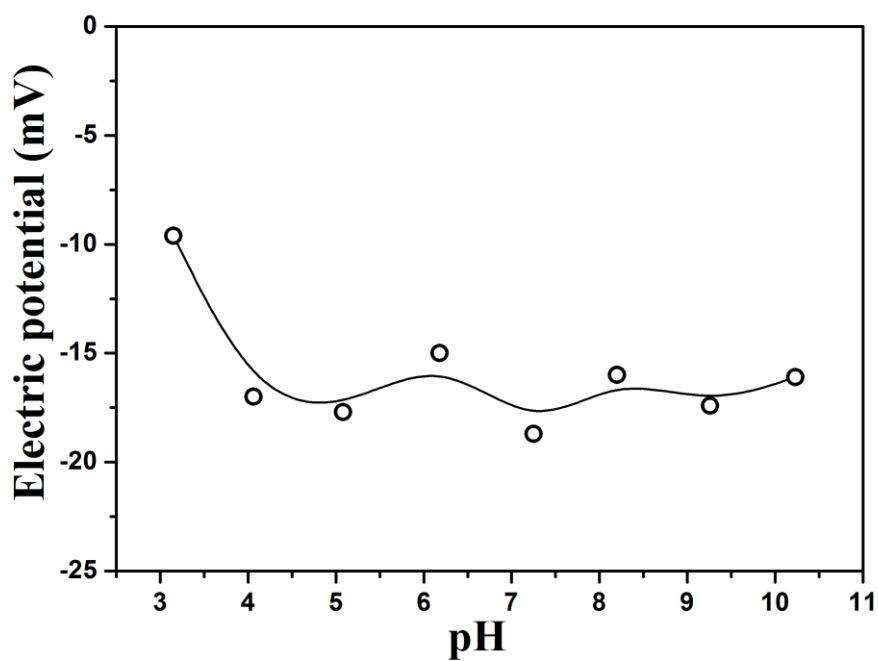

**Figure S3.** The zeta potentials curve of the as-synthesized BiOI products.

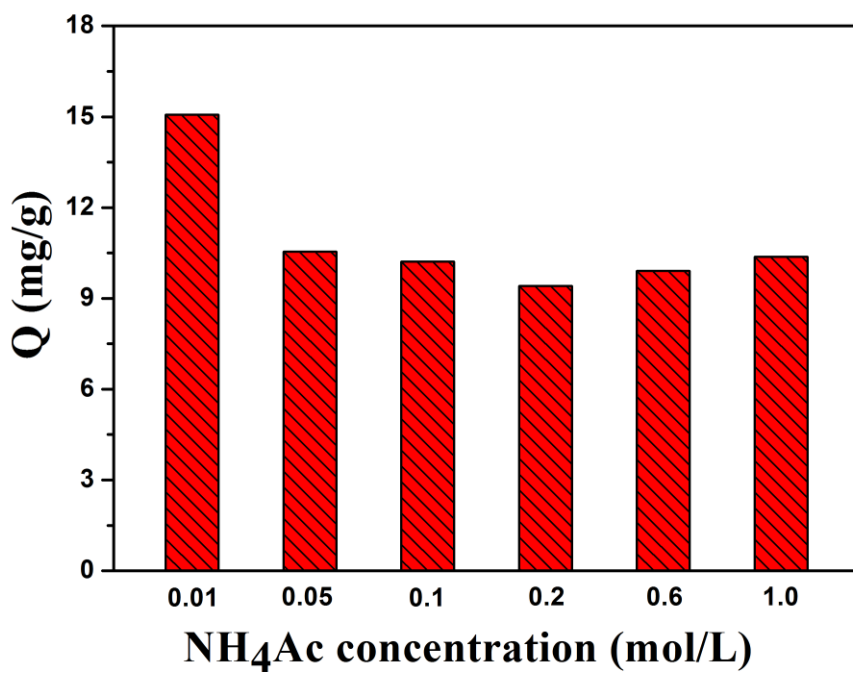

**Figure S4.** Residual RhB concentrations after desorption by NH<sub>4</sub>Ac solutions. Dose of BiOI was 1 g/L,  $C_0=60$  mg/L and  $T=298$  K.

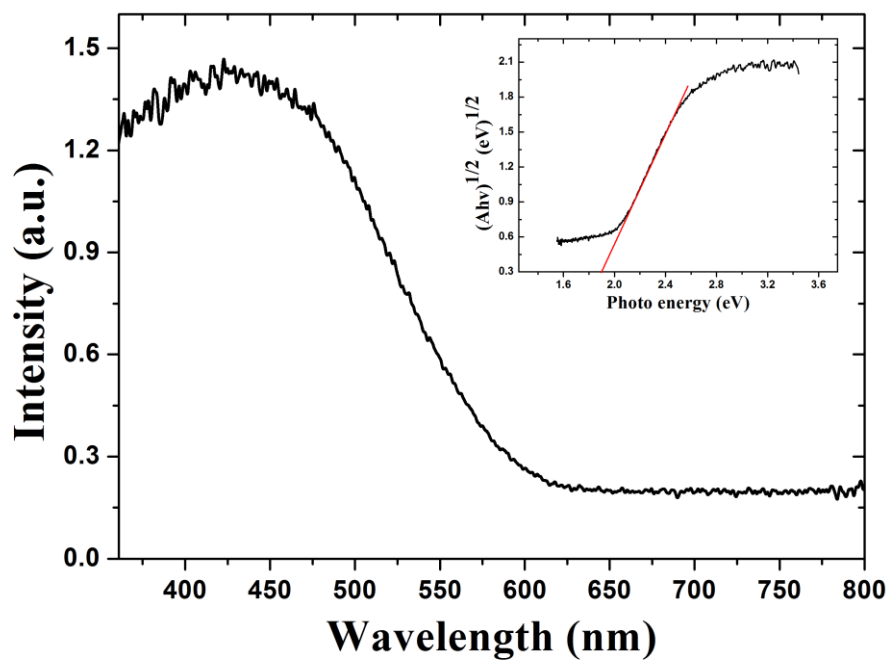

**Figure S5.** The diffuse reflection spectrum of as-prepared BiOI sample. The inset is the  $(Ah\nu)^{1/2}-h\nu$  curve.

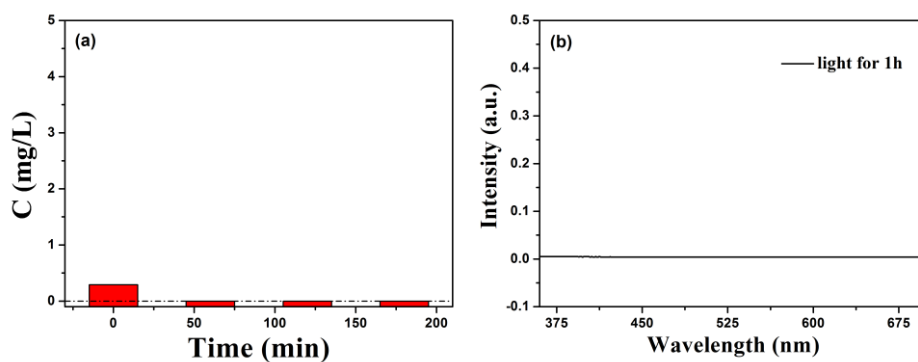

**Figure S6.** (a) Residual RhB concentrations after desorption by 0.5 M  $\text{NH}_4\text{Ac}$  solutions. Dose of BiOI was 1 g/L,  $C_0=5$  mg/L and  $T=298$  K. (b) UV-vis spectral changes of RhB after lighting for 1 h.

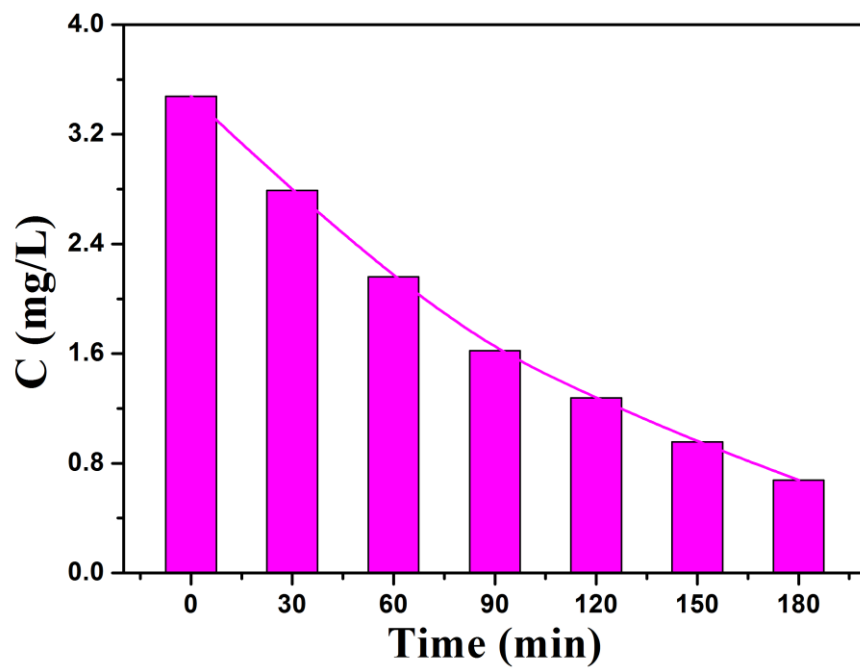

**Figure S7.** The change of RhB concentration in pure water after adsorption for 1 h in dark as a function of irradiation time.
